# Supplementary material for: Interaction between 8-hydroxyquinoline ruthenium(ii) complexes and basic fibroblast growth factors (bFGF): inhibiting angiogenesis and tumor growth through ERK and AKT signaling pathways
Source: Royal Society of Chemistry journal article supplement (doi:10.1039/c3mt00237c), 2013-12-16
Supplement: c3mt00237c.pdf [file c3mt00237c.pdf]

## Electronic Supplementary Information (ESI)

### **Interaction between 8-hydroxyquinoline ruthenium (II) complexes and basic fibroblast growth factors (bFGF): inhibiting angiogenesis and tumor growth through ERK and AKT signaling pathways**

Licong Yang, Jingnan Zhang, Chuan Wang, Xiuying Qin, Qianqian Yu,  
Yanhui Zhou\*, and Jie Liu\*

Department of Chemistry, Jinan University, Guangzhou 510632, China.

Tel.: +86 20 85220223; fax: +86 20 85220223; E-mail: tliuliu@jnu.edu.cn (Jie Liu),  
972601962@qq.com (Yanhui Zhou)

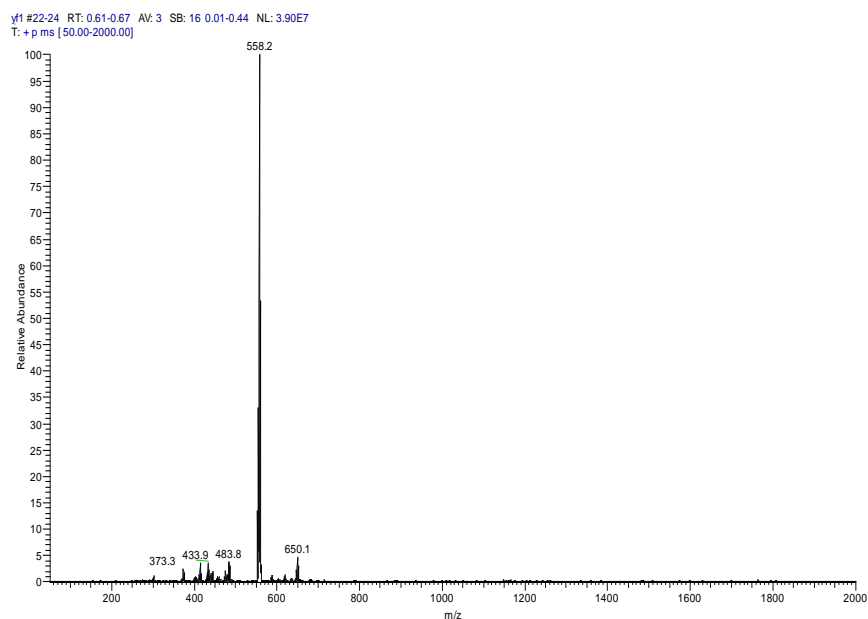

**Fig. S1.** ESI-MS of  $[\text{Ru}(\text{bpy})_2(8\text{-HQ})]^+$  (BQ).

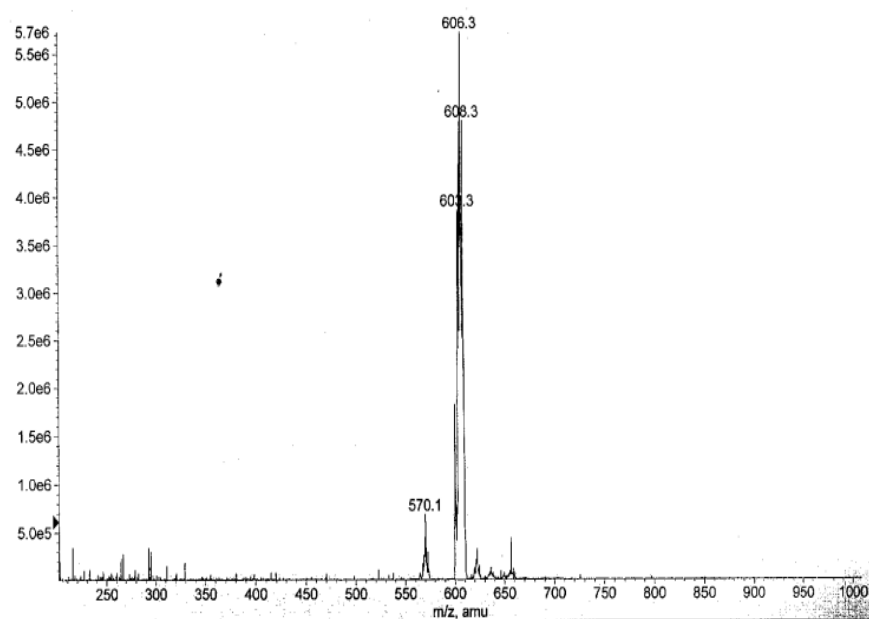

**Fig. S2.** ESI-MS of  $[\text{Ru}(\text{phen})_2(8\text{-HQ})]^+$  (PQ).

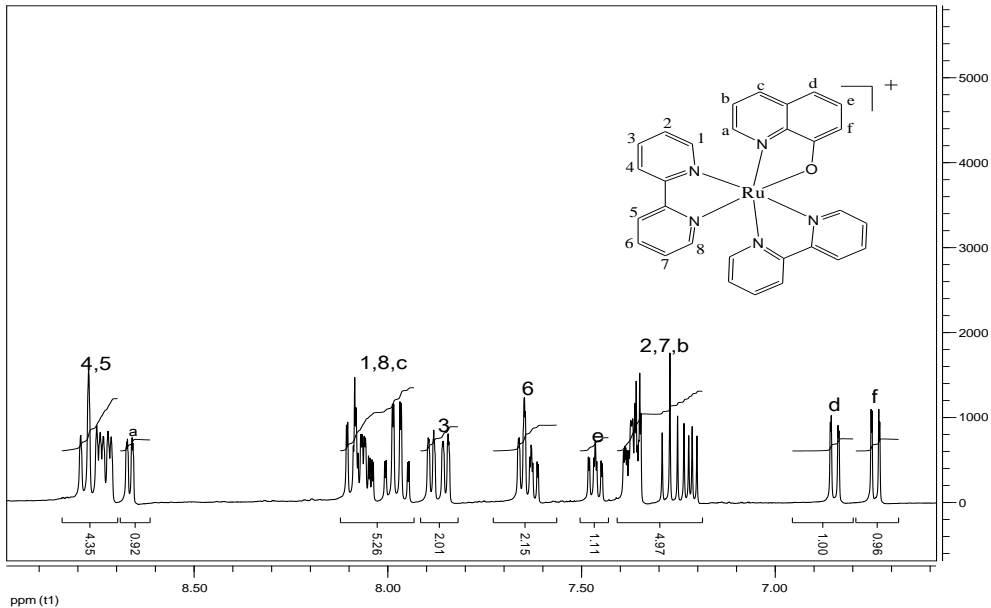

**Fig. S3.** <sup>1</sup>H-NMR of [Ru(bpy)<sub>2</sub>(8-HQ)]<sup>+</sup> (BQ).

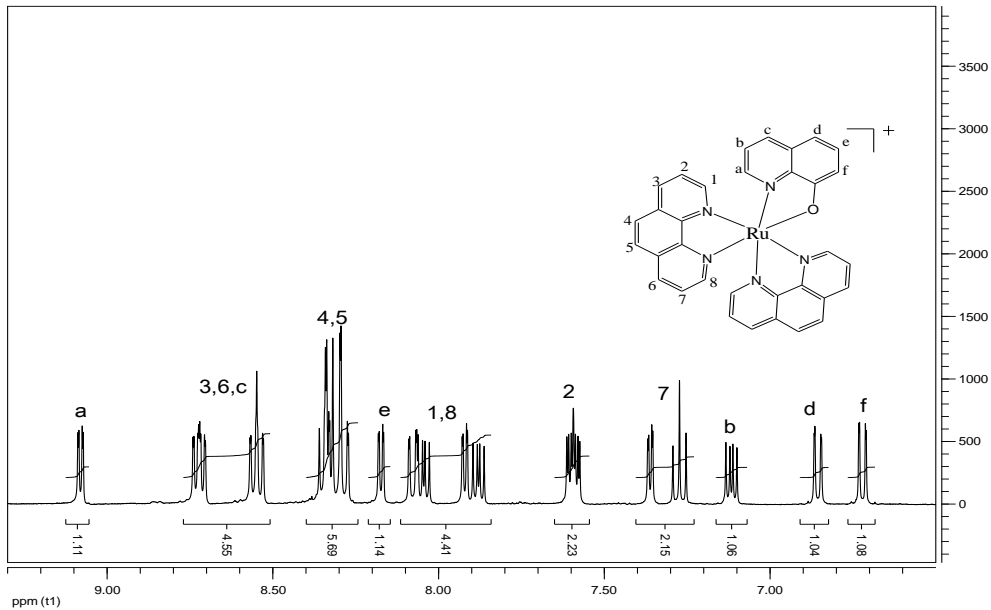

**Fig. S4.** <sup>1</sup>H-NMR of [Ru(phen)<sub>2</sub>(8-HQ)]<sup>+</sup> (PQ).
